# Supplementary material
Source: Elsevier journal article supplement (https://www.sciencedirect.com/science/article/pii/S1579212921001245)
Supplement: mmc1 [file S1579212921001245:mmc1.doc]

**Tabla 1 suplementaria. Datos sociodemográficos, características clínicas y analíticas y complicaciones de los pacientes con enfermedad tromboembólica venosa a los que se les colocó filtro de vena cava inferior.**

| **VARIABLE** | **n=65** |
| --- | --- |
| **DATOS DEMOGRAFICOS** |  |
| Sexo varón, n (%) | 41 (63,5%) |
| Edad (años), p50 (p25-p75) | 62 (49,5-74,5) |
| **ANTECEDENTES** |  |
| Alergia medicamentosa conocida, n (%) | 9 (13,5%) |
| Hipertensión, n (%) | 30 (46%) |
| Dislipemia, n (%) | 18 (27,7%) |
| Tratamiento con estatinas previo, n (%) | 12 (18,5%) |
| Enfermedad renal cronica, n (%) | 3 (4,6%) |
| Enfermedad respiratoria previa, n (%) | 1 (1,5%) |
| Fumadores, n (%) | 21 (32,3%) |
| Enfermedades cardíacas, n (%) | 4 (6,2%) |
| Diabetes Mellitus, n (%) | 9 (13,8%) |
| Ictus, n (%) | 3 (4,6%) |
| Tratamiento con AINES previo, n (%) | 4 (6,2%) |
| Tratamiento antiplaquetario previo, n (%) | 5 (7,7%) |
| **CARACTERISTICAS ENFERMEDAD TROMBOEMBOLICO VENOSA** |  |
| ***Localización enfermedad tromboembólica venosa*** |  |
| Trombosis venosa profunda aislada | 34 (53,1%) |
| Tromboembolia de pulmón aislada | 21 (32,8%) |
| Trombosis venosa profunda con tromboembolia de pulmón | 9 (14,1%) |
| ***Factores de riesgo de enfermedad tromboembólica venosa*** |  |
| Cirugía previa, n (%) | 12 (18,5%) |
| Embarazo o puerperio, n (%) | 2 (3,1 %) |
| Inmovilización, n (%) | 22 (33,8%) |
| Neoplasia, n (%) | 29 (44,6%) |
| Traumatismo previo, n (%) | 3 (4,6%) |
| Varices, n (%) | 1 (1,5%) |
| Sin factor de riesgo o idiopático, n (%) | 11 (16,9%) |
| Neoplasia activa, n (%) | 32 (49,2%) |
| Histología: Adenocarcinoma, n (%) | 12 (37,5%) |
| ***Localización neoplasia*** |  |
| Renal, n (%) | 6 (18,8%) |
| Hematologico, n (%) | 3 (9,4%) |
| Ovario, n (%) | 3 (9,4%) |
| Pulmón, n (%) | 3 (9,4%) |
| Cerebral, n (%) | 2 (6,3%) |
| Colon-Recto, n (%) | 2 (6,3%) |
| Ovario, n (%) | 2 (6,3%) |
| Esofago, n (%) | 1 (3,1%) |
| Otros, n (%) | 10 (18,8%) |
| ***Situación neoplasia*** |  |
| Metástasis, n (%) | 20 (62,5%) |
| ***ECOG (*Eastern Cooperative Oncology Group) *performance status*** |  |
| 0, n (%) | 22 (71%) |
| 1, n (%) | 5 (16,1%) |
| 2, n (%) | 4 (12,9%) |
| ***Situación del cáncer*** |  |
| Progresion, n (%) | 14 (43,8%) |
| Estabilidad, n (%) | 11 (34,4%) |
| Curado, n (%) | 1 (3,1%) |
| Remison completa, n (%) | 1 (3,1%) |
| **SINTOMAS AL DIAGNOSTICO** |  |
| Disnea, n (%) | 13 (20%) |
| Sincope, n (%) | 9 (13,8%) |
| Dolor torácico, n (%) | 5 (7,7%) |
| SatO2%, p50 (p25-p75) | 97,5 (92,75-99,25) |
| Frecuencia Cardiaca lpm, p50 (p25-p75) | 90 (74,5-106) |
| Tensión Arterial Sistolica, p50 (p25-p75) | 122 (104-141,5) |
| **ANALITICA A LA COLOCACION DE FILTRO VENA CAVA** |  |
| Hemoglobina (g/l), p50 (p25-p75) | 110 (95,5-128,5) |
| Creatitina (mg/dl), p50 (p25-p75) | 0,83 (0,65-1,09) |
| Plaquetas (x10e9), p50 (p25-p75) | 260 (170,5-360,5) |
| **MOTIVOS DE COLOCACION DE FILTRO DE VENA CAVA** |  |
| Sangrado reciente, n (%) | 25 (38%) |
| Alto riesgo de sangrado, n (%) | 12 (18,5%) |
| Intervención quirurgíca, n (%) | 35 (53,8%) |
| Dias desde diagnóstico de enfermedad tromboembólica venosa hasta colocación de Filtro Vena Cava, días p50 (p25-p75) | 14 (3-29,5) |
| Retirada del Filtro, n (%) | 41 (63,1 %) |
| Dias hasta retirada del filtro, p50 (p25-p75) | 25 (16,5-40,5) |
| Meses desde ultimo seguimiento, meses p50 (p25-p75) | 8,77 (3,53-17,97) |
| **COMPLICACIONES** |  |
| Recurrencias, n (%) | 2 (3,1%) |
| Localización de la recurrencia |  |
| Mesenterica, n (%) | 1 (1,5%) |
| Miembros inferiores, n (%) | 1 (1,5%) |
| Hemorragias, n (%) | 6 (9,2%) |
| Hemorragia grave, n (%) | 5 (7,7%) |
| Dias desde colocación del Filtro Vena Cava hasta hemorragia, p50 (p25-p75) | 40,5 (10,25-130,75) |
| Exitus, n (%) | 15 (23,1%) |
